# Supplementary material
Source: PubMed Central journal article supplement (PMC9635595)
Supplement: NIHMS1838738-supplement-Supplementary_table1.pdf [file NIHMS1838738-supplement-Supplementary_table1.pdf]

# Supplementary Table 1

| Gene name | 5' - 3' Forward and Reverse                     | Gene name | 5' - 3' Forward and Reverse                       |
|-----------|-------------------------------------------------|-----------|---------------------------------------------------|
| GLI2      | CGGATCAGTCTGTCCTTCGG<br>GAAATGACGCTCGAACAGGC    | IL12A     | TACCCTTGCACTTCTGAAGAGAT<br>GCCAGGCAACTCCCATTAGTTA |
| NEXN      | CAGAAGTGTTAGCGGCCAGA<br>TCTTTAATCTCAGCCTTTGGGA  | TNFRSF12A | GCTGGCTCACACAAAACAGC<br>GCCTAGTGTCAAGTCTGCC       |
| CDH2      | ATCCCTGCTTTCATTCTGACAT<br>AGCTTCTCACGGCATAACACC | TNFAIP3   | CGCCAAGAGAGATCACACCC<br>GCGATCCTTTCGCAAAGTCC      |
| PFN2      | CAGAGCTGGTAGAGCATTGGT<br>AGATGGGGAGAGGGCTGCTTA  | GLIPR1    | GGCTTCTGCTTGTTTAGCTAC<br>GCAAATCAGAAGAAGCGGCA     |
| VIM       | TCCGCACATTCTGAGCAAAGA<br>ATTCAAGTCTCAGCGGGCTC   | DKK1      | GTGCAAATCTGTCTCGCCTG<br>GCACAACACAATCTGAGGC       |
| MDGA1     | GCCAAAACCTCATGCCCA<br>GCTGACGCTGAGCGCTAGAA      | SAT1      | CTCCGGAAGGACACAGCATT<br>CACCTCATTGCAACCTGGCT      |
| PTHLH     | TGTGAACATTCTCCGCTCG<br>CACTGCTGAACCAGTCTCCG     | PTTG1     | CCAACGGCAACTGTCTGATG<br>CTAAACAGCGGAACAGTCACG     |
| SPP1      | GAATCTCTAGCCCCACAGACC<br>CGTGGGAAAATCAGTGACCAGT | RGS4      | CCTCGAGCTGCCGTTTAG<br>GGATCATCGTCTCCACGCAG        |
| IGFBP2    | TGTGAGAAGCGCCGGGAC<br>GCCTCCTTCTGAGTGGTCATC     | JUN       | GGAGACAAGTGGCAGAGTCC<br>CCAAGTTCAACAACCGGTGC      |
| ECM1      | CATCCCCCTTCTATAGTGACG<br>CAAATGGAGCTGGCGTTCC    | IGFBP3    | GCCAGCTCCAGGAAATGCTA<br>GGGGTGGAACTGGGATCAG       |
| ALOX15B   | CTGCCACCCTCTTCAAGTC<br>GAGAAGATCTCTGACCCAGG     | COL6A3    | TGTCAAAAATGGTGC GGCTG<br>CCAGTCTGATTGTTCCCC       |
| CDH11     | TGCCAAGCTTAATGGAACC<br>GTTGGACTCTCTGTAGCCACC    | FSTL1     | GGGTTCTCTGCCTGCTAAC<br>TGGCCTTAATTGGGGGAAAGG      |
| COL8A2    | GCTACTGAAATGCCTTACCG<br>CCTGGTCCCCTCGTATTCCT    | SERPINE1  | GAAGTCGACCTCAGGAAGCC<br>ACTGTTCTGTGGGGTTGTG       |
| MMP2      | GACCGCTTGGCTTCAAATCA<br>GCACAAACAGGTTGCAGCTC    | MMP1      | GAAAGAAGACAAAGGCAAGTTGA<br>CTCTTGGCAAATCTGGCGTG   |
| APLP1     | CATCGCCCTTATCAACGACC<br>CAGGCTCTGATTACCCCTCTC   | TGFBI     | GTGCGGCTAAAGTCTCTCCA<br>CATGGACCACGCCATTTGTG      |
| MMP3      | TCCTACTGTTGCTGTGCGTG<br>CATCACCTCCAGAGTGTGG     | NRP2      | GGATCATCTGCCAGCTAC<br>GATGTCCACTGCAAAGCCG         |
| NRXN3     | CTTACCTGTGCCTCCCTG<br>GATGAAAACACAGCAGCAGCA     | BDNF      | GGTGTGTAATCCGGGCGATA<br>CGTGTTCGAAAGTGTGACCC      |
| LGALS1    | GACGCTAAGAGCTTCGTGCT<br>CGTTGAAGCGAGGTTGAAG     | SDC1      | CGAAAGCGACGTTCCGGC<br>CTCTCTACTGCCGATTCTCTC       |
| TGM2      | GATCCGGAAGCACAGGAGAC<br>CCAGCTCCAGATCACACCTC    | MSX1      | TCCGCAAACACAAGACGAAC<br>GACAGGTA CTGCTTCTGGCG     |
| GEM       | CGAGACGGAGAAGGGAGAGA<br>GGGGCTCTTCTGGACCATC     | MSX2      | GTGAAGCCCTTCGAGACCG<br>CATATGTCTCTACTCTCTGCC      |
| GADD45A   | AGAAGACCGAAAGCGACCC<br>GTTGATGTGTTCTCGCAGC      | CRLF1     | CTCTCCCGTGTACTCAACGC<br>CAGGCCAACATAGAGGCAGG      |
| FBLN2     | GCCCCGCGGGTCTTAC<br>CTCAATGCAGTTCTCCAGCG        | CD24      | GAGGCGCTCACAGAACAAAGC<br>GCCTAGCGCGAACCCCTTC      |
| NT5E      | AGCTAGCGCAACCACAAAC<br>GCGCGAGGAAGGAATTGGAG     | THY1      | GGACACAGACCAGAGGAAATGA<br>CGGCTGCAGCTACAATCAATG   |
| PLAUR     | AGGGAAGTTTGTGGCGGAGG<br>GCAATCCCCGTTGGTCTTACA   | EFEMP2    | GCCTCCAACCTCTATGTCTG<br>TGGATCTGGAACACGTCAGC      |
| TGFB2     | TGTTACAACACCCTCTGGCTC<br>GGGTCTGTAGAAAGTGGGCG   | SPHK1     | CGAAAAGTTT GAGGCCGAG<br>CGTTCCTACAGTGGCCTG        |
| FAS       | GTGAACACTGTGACCCTTGC<br>GCCACCCCAAGTTAGATCTGG   | STIL      | ACCCTGCAAACAGACCTCAG<br>CTGGTATTCATCTGGGGCCG      |
| IL32      | CTCTCTCGGCTGAGTATTTGTG<br>GGCTCGACATCACCTGTCC   | GAPDH     | GGAAGGAAATGAATGGGCAGC<br>TAGGAAAAGCATCACCCGGAG    |
